# Supplementary material for: γH2A/γH2AX Mediates DNA Damage-Specific Control of Checkpoint Signaling in Saccharomyces cerevisiae
Source: MDPI journal article supplement (doi:10.3390/ijms25052462), 2024-02-20
Supplement: s1 [file s1]

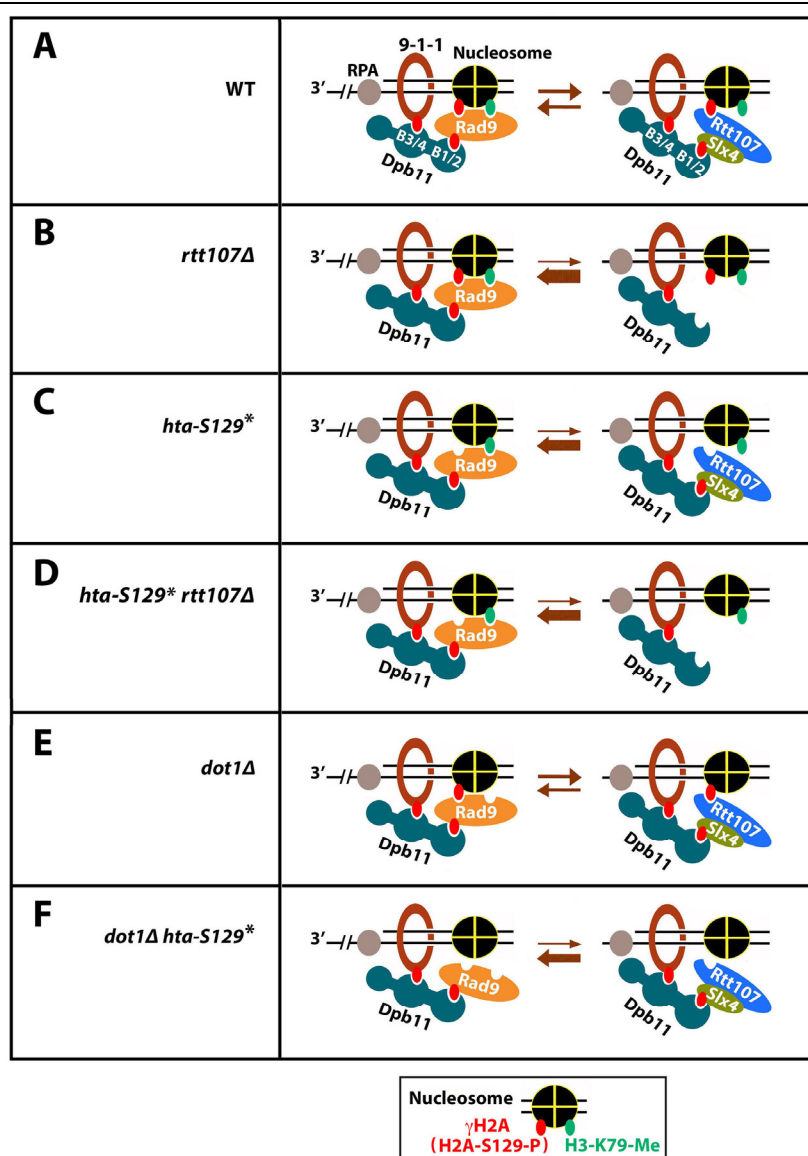

**Figure S1.** Illustration of the competition between Rad9 and Slx4/Rtt107 for binding  $\gamma$ H2A and Dpb11 in various genetic backgrounds in response to DNA damage. See the text for descriptions. The genetic background considered here are (A) Wild type, (B) *rtt107Δ*, (C) *hta-S129\**, (D) *hta-S129\* rtt107Δ*, (E) *dot1Δ*, and (F) *dot1Δ hta-S129\**.

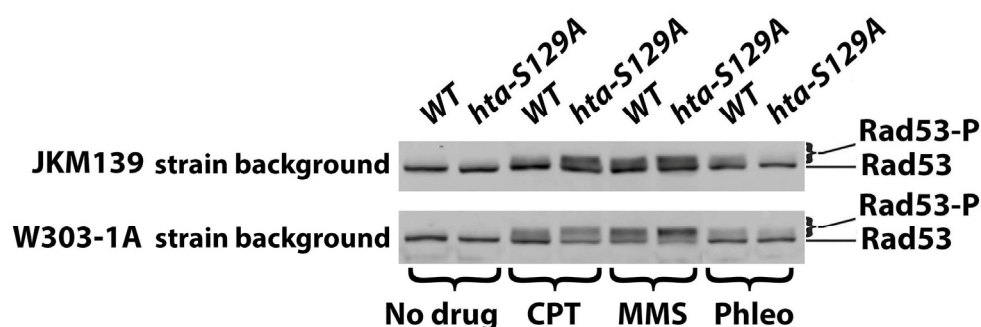

**Figure S2.** The effect of  $\gamma$ H2A on DDC is DNA damage-specific. Shown is Western analysis of Rad53 from JKM139 and R726 (JKM139, *hta-S129A*) (#17 and 18 in Table 1) as well as W303-1A and SKY2939 (W303-1A, *hta-S129A*) (#1 and 3 in Table 1) treated with 5  $\mu$ g/ml CPT, 0.01% MMS or 5  $\mu$ g/ml phleomycin, or mock treated (No drug).
